# Supplementary material for: Impact of foliar application using amino acids, yeast extract, and algae extract in different concentrations on growth parameters, yield traits, grain quality, and nitrogen-related parameters of wheat in arid environments
Source: PeerJ. 2025 Aug 15;13:e19802. doi: 10.7717/peerj.19802 (PMC12360320; doi:10.7717/peerj.19802)
Supplement: Supplemental Information 1 [file peerj-13-19802-s001.xlsx]

## Sheet: Data
Season	Treatment	Replication	Plant height (cm)	Chlorophyll content (SPAD reading)	Dry weight/plant (g)	No. spikes/m2	Spike length (cm)	Spike weight (g)	No. spikelets/spike	No. grains/spike	1000-grains weight (g)	Biological yield (tons/ha)	Grain yield (tons/ha)	Straw yield (tons/ha)	Grain nitrogen content (%)	Straw nitrogen content (%)	Grains protein content (%)	Nitrogen uptake efficiency (kg N absorbed/kg N available)	Nitrogen use efficiency (kg grain/kg N available)
First	Cotrol	1	102	39.6	11.1	359.845	9.8	24	17	45	50.6	14	5.85524	8.14476	2.422	0.5	13.8054	46.9068	15.0462
First	Cotrol	2	105	38.5	10.7	383.776	10.2	22	15	50	50	14.2857	5.73571	8.55	2.324	0.45	13.2468	44.1406	14.7391
First	Cotrol	3	106	36.6	12.1	387.527	9.6	23	14	44	49.5	13.6429	5.95214	7.69071	2.352	0.4	13.4064	43.8795	15.2952
First	Amino- 1.5	1	106	42.3	18.4	479.82	12.9	33.6	18.3	57	55.4	17.7381	7.02381	10.3995	2.3836	0.75	13.5865	63.0646	18.0491
First	Amino- 1.5	2	110	47.3	20.2	425.25	13.1	32	20	60	54.9	18.0952	7.0231	10.5048	2.5016	0.72	14.2591	64.5828	18.0473
First	Amino- 1.5	3	113	45.7	21.4	468.831	12.6	29.6	21	62	55.8	17.381	7.01905	10.2619	2.537	0.71	14.4609	64.4823	18.0369
First	Aminno- 3	1	114	44.2	24.2	539.586	14.6	49.6	19.9	65.7	59.9	19.0476	8.47619	11.3333	2.9264	0.92	16.6805	90.5342	21.7813
First	Aminno- 3	2	120	46.9	22.4	459.537	14.2	52	22	67.5	59.7	18.8095	8.46429	11.1071	3.009	0.95	17.1513	92.5628	21.7507
First	Aminno- 3	3	118	49.2	22.6	544.176	14.3	55.2	24	69.3	61	19.2857	8.45238	10.5667	2.9736	0.88	16.9495	88.4817	21.7201
First	Algea- 5	1	103	45.6	15.1	532.122	12.5	26	18.15	53	54.8	17.4602	7.06071	10.0421	2.4662	0.74	14.0573	63.8425	18.1439
First	Algea- 5	2	108	44.6	16.8	427.592	12.3	29	19	55	54.3	17.481	6.97619	9.95952	2.4898	0.68	14.1919	62.0372	17.9267
First	Algea- 5	3	112	44	17.4	394.792	12.7	31	20	51	54.1	17.381	7.11905	10.1286	2.4544	0.7	13.9901	63.1196	18.2938
First	Algea- 10	1	109	48.2	16.9	488.907	13.7	37.6	19	60	58.8	18.7143	7.38095	10.7143	2.7022	0.86	15.4025	74.9302	18.9669
First	Algea- 10	2	114	44.5	18.7	478.382	13.5	36.8	20	63	59.2	18.7302	7.6231	11.0721	2.7258	0.84	15.5371	77.2957	19.5891
First	Algea- 10	3	116	44.9	19.4	530.779	13.8	35.2	23	61	59	18.4286	7.8619	10.3619	2.773	0.82	15.8061	77.8564	20.2028
First	Yeast- 50	1	103	43.6	14.7	378.338	12.4	26	17.8	50	54.2	15.7262	6.57857	9.14762	2.4072	0.69	13.721	56.9133	16.905
First	Yeast- 50	2	106	42.7	16.4	393.344	12.6	25	19	55	54	15.8095	6.64286	9.16667	2.4426	0.71	13.9228	58.4201	17.0702
First	Yeast- 50	3	111	41.2	17.5	418.647	12.2	28	20	52	53.7	15.8731	6.50714	9.36595	2.478	0.66	14.1246	57.3204	16.7214
First	Yeast- 100	1	107	47.1	23.2	502.907	13.4	32	18.12	57	57.4	17.7779	7.73571	10.5714	2.5252	0.79	14.3936	71.6579	19.8785
First	Yeast- 100	2	113	46	20.7	457.036	13	29.6	20	62	57.8	17.6976	7.7381	10.3452	2.5606	0.76	14.5954	71.1205	19.8846
First	Yeast- 100	3	110	44	22	489.726	13.6	30.4	22	64	58.1	17.8548	7.72619	10.8333	2.5016	0.78	14.2591	71.3808	19.854
Second	Cotrol	1	80	36.2	10.6	332	8	21	18	41	48.1	14.2857	5.68381	8.6019	2.436	0.48	13.8852	54.6094	17.2681
Second	Cotrol	2	90	39.6	9.9	348	10	23	18	44	47.7	13.6507	5.66286	7.98786	2.366	0.44	13.4862	51.3838	17.2045
Second	Cotrol	3	85	38.2	10.5	336	9	24	18	45	47.9	13.6507	5.70905	7.94167	2.394	0.41	13.6458	51.4159	17.3448
Second	Amino- 1.5	1	87	43.1	18	392	12	36.8	22	55	54.1	16.619	6.78571	9.83333	2.6078	0.72	14.8645	75.272	20.6159
Second	Amino- 1.5	2	100	43.5	18.9	392	11	36	24	54	53.8	16.5476	6.62143	9.92619	2.5724	0.68	14.6627	72.2551	20.1168
Second	Amino- 1.5	3	96	44.6	19.5	388	12	36.8	22	56	54.3	16.5079	6.85714	9.65071	2.5488	0.65	14.5282	72.1569	20.8329
Second	Aminno- 3	1	103	45.6	21.2	480	14	46.2	24	61.2	59.1	19.9048	8.5	11.4762	2.9146	0.85	16.6132	104.903	25.8241
Second	Aminno- 3	2	100	46.4	21.9	428	13	44.8	24	63.9	58.9	19.6826	8.49643	11.7002	2.9618	0.87	16.8823	107.379	25.8132
Second	Aminno- 3	3	107	46.8	22.9	536	13	44.1	24	63	59.5	19.4448	8.4881	11.5	2.9382	0.83	16.7477	104.769	25.7879
Second	Algea- 5	1	83	42.2	15.5	372	12	29	22	51	53.2	14.681	7.00214	9.19048	2.6196	0.72	14.9317	75.8316	21.2734
Second	Algea- 5	2	89	43.11	17	388	11	27	22	53	52.7	16.8255	6.5119	9.2619	2.5724	0.67	14.6627	69.7454	19.784
Second	Algea- 5	3	99	42.8	16.9	352	10	28.6	22	48	52.9	16.5857	6.25167	9	2.537	0.7	14.4609	67.3264	18.9934
Second	Algea- 10	1	95	43.4	16.9	444	12	40	24	57	57.2	18.381	7.66667	11.4048	2.7494	0.76	15.6716	90.3732	23.2923
Second	Algea- 10	2	89	45.4	18.6	420	14	41	22	60	58.1	18.4126	7.63929	11.1862	2.7966	0.74	15.9406	90.0556	23.2091
Second	Algea- 10	3	103	45.8	18.5	460	12	39.8	22	68	58.3	18.2143	7.64286	10.9567	2.7848	0.77	15.8734	90.2946	23.22
Second	Yeast- 50	1	90	42	13.5	348	11	25	20	50	52.1	15.3571	6.16667	7.01429	2.3954	0.75	13.6538	60.8608	18.7351
Second	Yeast- 50	2	85	42.2	14.6	336	10	27	22	51	52.8	15.2619	6	9.18619	2.4426	0.67	13.9228	63.2245	18.2288
Second	Yeast- 50	3	92	41.4	15.5	360	11	26.3	20	48	52.3	15.2381	6.2381	8.94286	2.419	0.64	13.7883	63.2337	18.9521
Second	Yeast- 100	1	91	43.4	20.6	412	12	37	22	55	56.1	18	6.90476	10.9979	2.7376	0.76	15.6043	82.822	20.9776
Second	Yeast- 100	2	95	44.2	19.4	420	11	38.5	22	58	56.9	17.1429	6.71238	10.631	2.6904	0.73	15.3353	78.4432	20.3931
Second	Yeast- 100	3	99	44.1	22.3	440	12	39	24	60	57.2	17.7381	6.71429	11.4864	2.714	0.72	15.4698	80.4885	20.3989
